# Supplementary material
Source: Springer Nature journal article supplement (https://www.springermedizin.de/resource/supplementary/12884_2009_238_MOESM3_ESM.pdf/9459914)

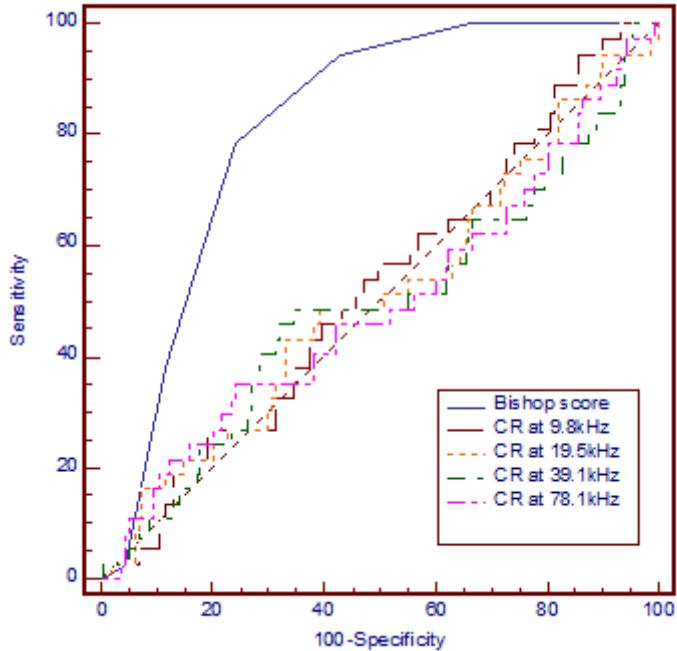

Supplement: MOESM3 [file 9459914]
